# Supplementary material
Source: PubMed Central journal article supplement (PMC4068659)
Supplement: AEM.00601-14_zam999105504so1.pdf [file AEM.00601-14_zam999105504so1.pdf]

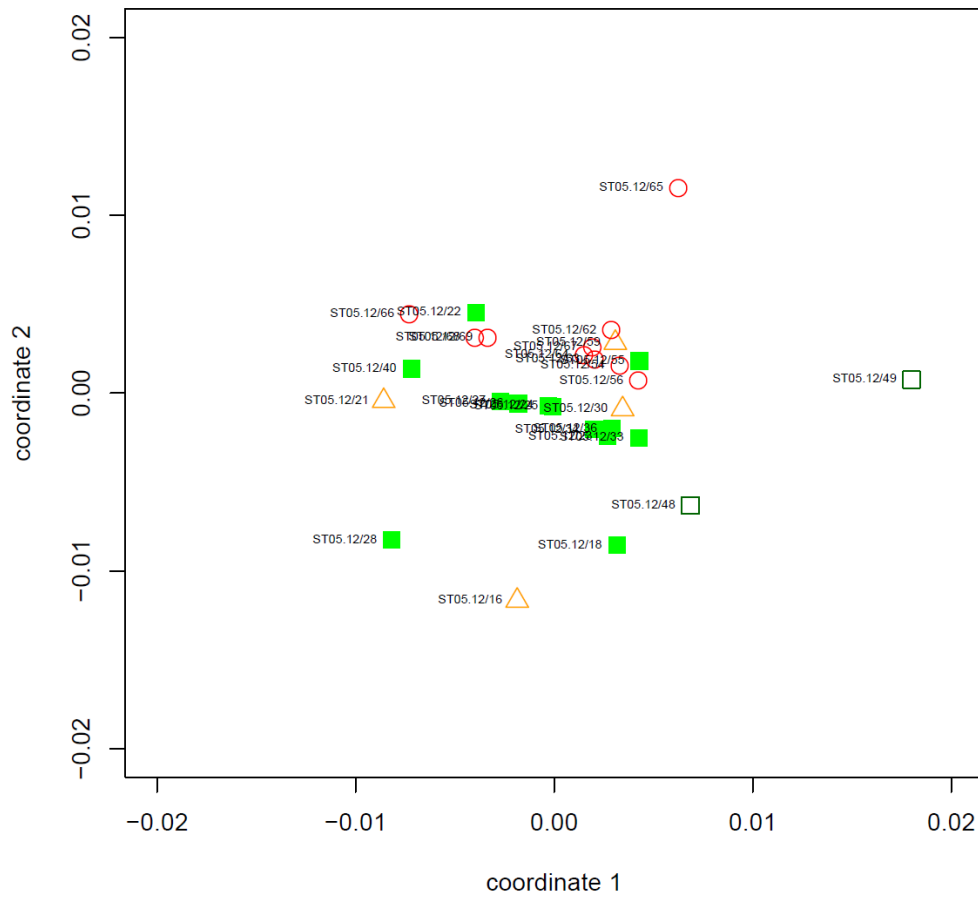

Fig. S1. Non-metric multidimensional scaling plot based on Pearson coefficient similarities of genetic fingerprints obtained by M13 fingerprinting performed for all *Brettanomyces (Dekkera) bruxellensis* isolates investigated in this study and seven additional wine strains (ST05.12/63, MUCL 54014; ST05.12/64, MUCL 54015; ST05.12/65, CBS 1940; ST05.12/66, CBS 1941; ST05.12/67, CBS1942; ST05.12/68, CBS 1943 and ST05.12/69, CBS 2336). Open dark green squares, closed green squares, red circles and orange triangles represent *B. bruxellensis* isolates from the Cantillon brewery, beer, wine and soft drinks, respectively (stress of plot = 0.13).

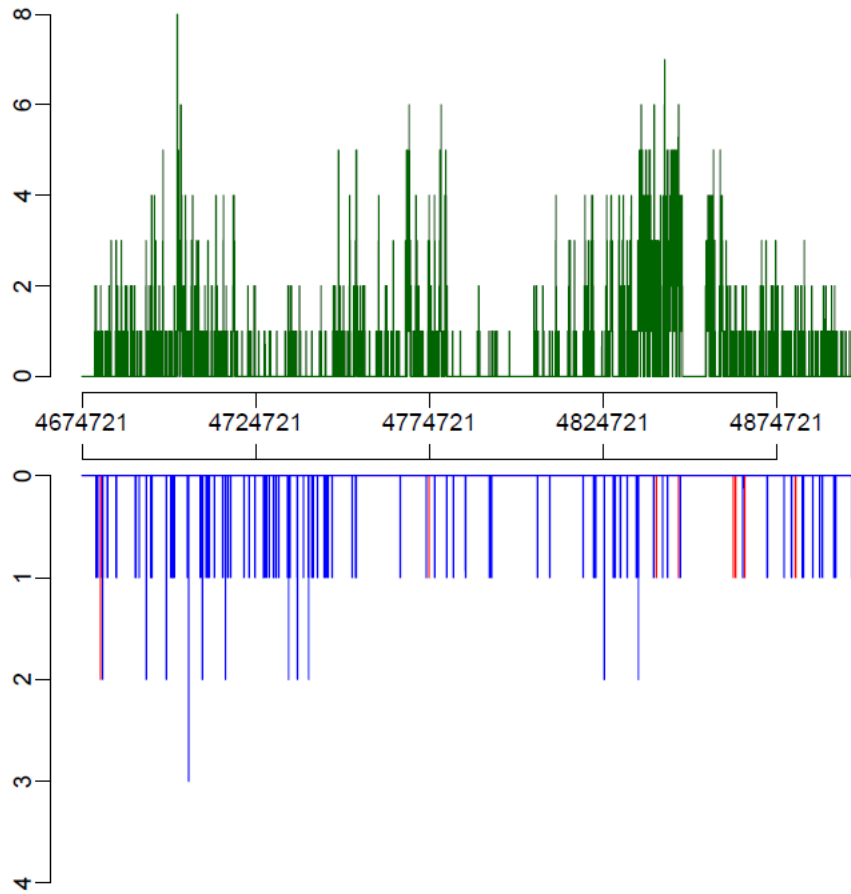

Fig. S2. Nucleotide variation in the genome of *Brettanomyces (Dekkera) bruxellensis* ST05.12/22 compared with AWRI 1499, showing single nucleotide polymorphisms (SNPs) (green bars), deletions (red bars) and insertions (blue bars), exemplified for scaffold 14. Variation is calculated as the number of variant bases in a 101 bp sliding window, centered at base 51 and with a 1 bp resolution.

AWRI 1499 contig AHIQ01000303

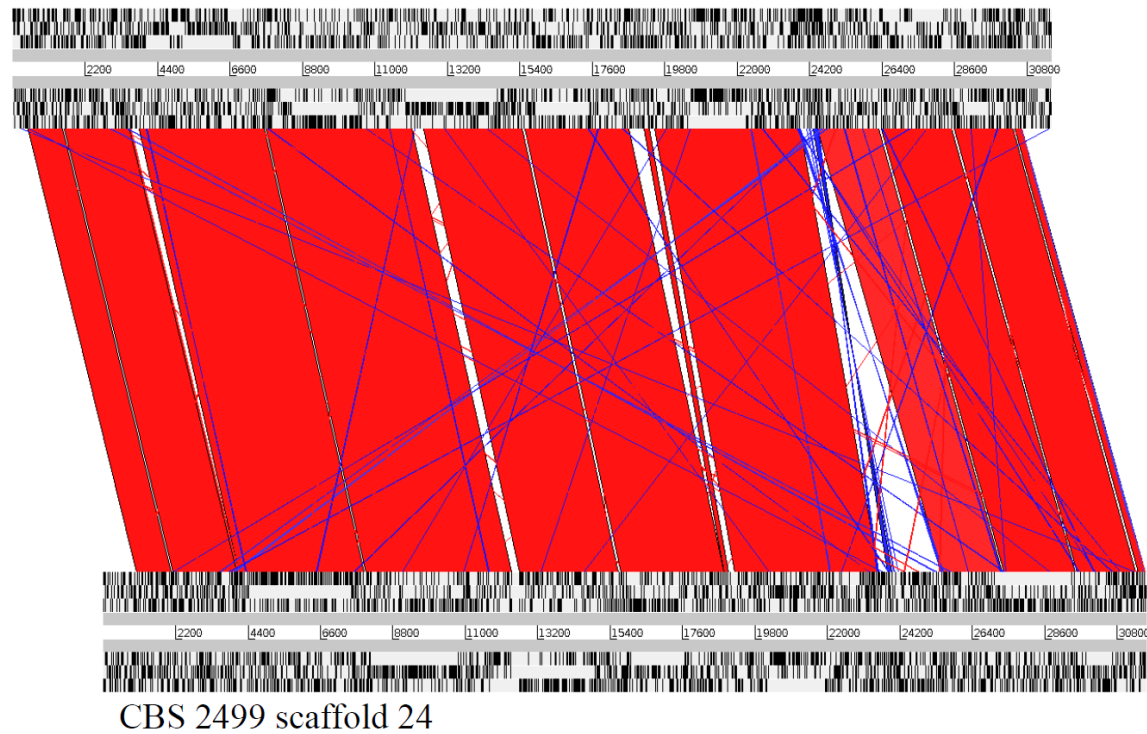

Fig. S3. Graphical representation (using ACT) of the presence of a  $\beta$ -galactosidase gene (1) together with the nitrate assimilation gene cluster (consisting of a nitrate reductase (2), nitrite reductase (3) and nitrate transporter gene (4)) in AWRI 1499 and CBS 2499. This gene cluster is absent in ST05.12/22.

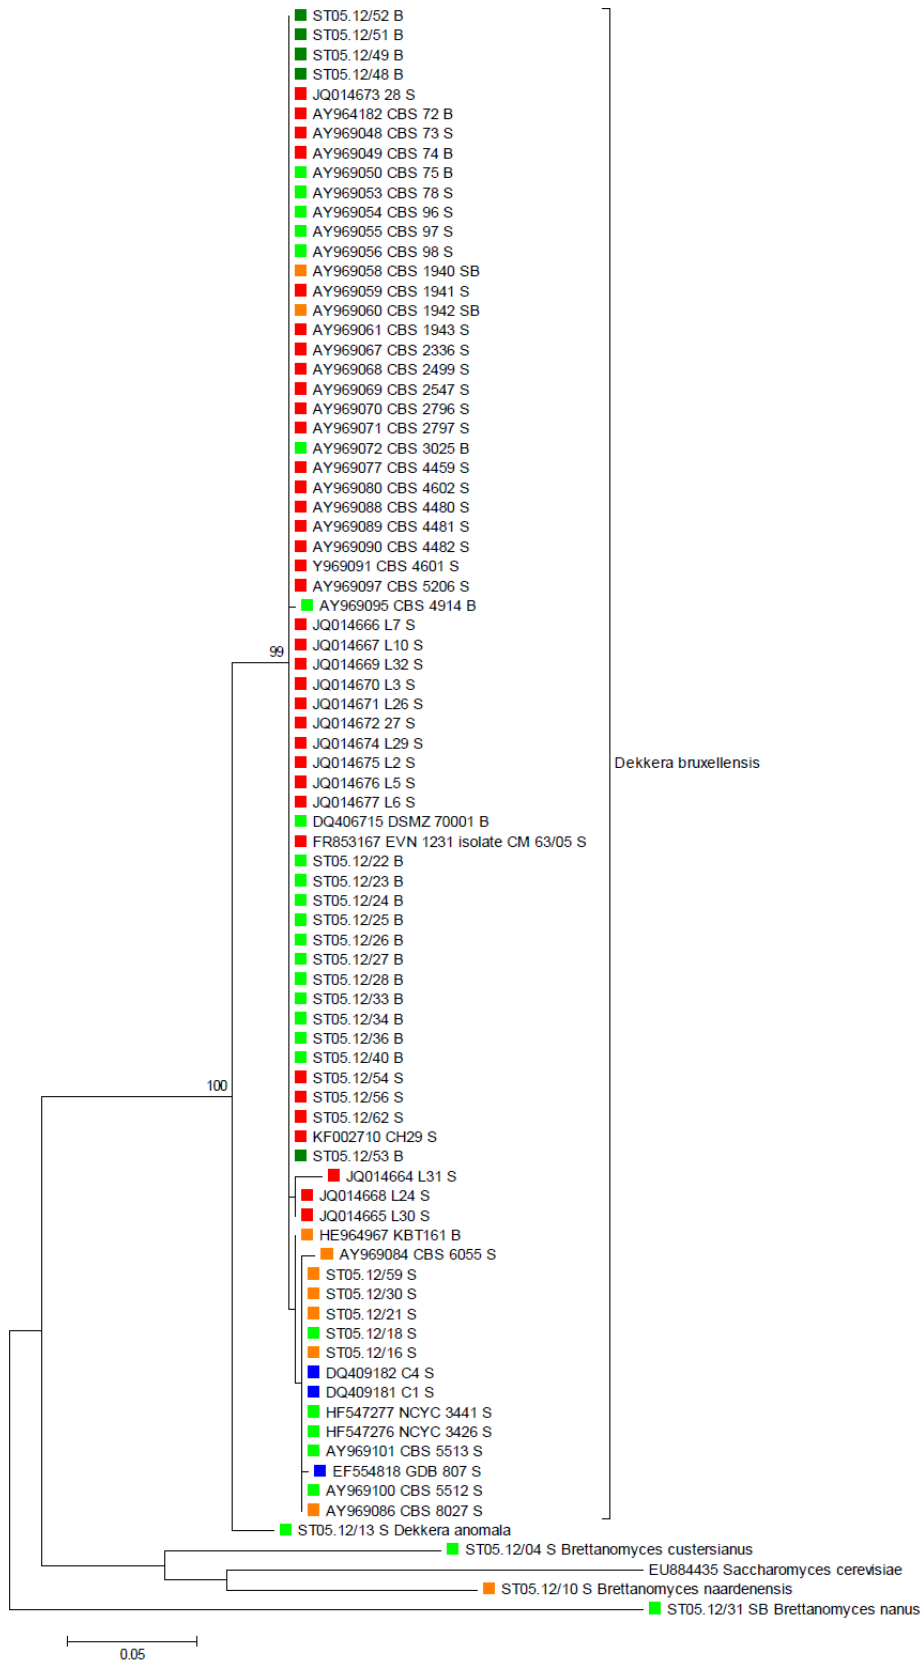

Fig. S4. Maximum likelihood tree (Tamura-Nei model) constructed with partial large subunit (LSU) ribosomal RNA (rRNA) gene sequences from all *Brettanomyces* strains investigated in this study and all *B. bruxellensis* LSU rRNA gene sequences available in GenBank (55 additional sequences; August 2013) (~400 bp). Bootstrap values >80% (based on 1,000 replicates) are given at the nodes of the tree. *Saccharomyces cerevisiae* was used as an outgroup. The origin of the different strains, i.e. beer, Cantillon brewery, soft drink, others and wine are highlighted in green, dark green, orange, blue and red, respectively.

Table S1. Primers used to complement/confirm bioinformatic analyses<sup>a</sup>

| Target (AWRI 1499 CDS Genbank Accession number, CBS 2499 JGI number or gene number in ST05.12/22) | Function target gene <sup>b</sup>                   | Primer Name  | Direction | Sequence (5'-3')        |
|---------------------------------------------------------------------------------------------------|-----------------------------------------------------|--------------|-----------|-------------------------|
| EIF45194                                                                                          | fungal specific transcription factor domain protein | EIF45194_F   | Forward   | TACCAAACGAGCGAACCTT     |
| EIF45194                                                                                          | fungal specific transcription factor domain protein | EIF45194_R   | Reverse   | GCAGGTTCTTTCGCATTCTC    |
| EIF45195                                                                                          | hypothetical protein AWRI1499_4942                  | EIF45195_F   | Forward   | ATCCGTGTCTCCAAAAGGTG    |
| EIF45195                                                                                          | hypothetical protein AWRI1499_4942                  | EIF45195_R   | Reverse   | CTCGGTAAATGCCGAAAGTC    |
| EIF45196                                                                                          | lectin-like protein                                 | AHIQ315_A1_F | Forward   | TGCACCTTGCTTTTGAGGTTG   |
| EIF45196                                                                                          | lectin-like protein                                 | AHIQ315_A1_R | Reverse   | AGCACGCTTTCACCTCGAAAT   |
| EIF45229                                                                                          | putative trna pseudouridine synthase                | EIF45229_F   | Forward   | GCCAATTTTGATAGGGCTCA    |
| EIF45229                                                                                          | putative trna pseudouridine synthase                | EIF45229_R   | Reverse   | GCCCATCTAAAGCCAGTTGA    |
| EIF45248                                                                                          | beta-galactosidase                                  | W54X_F       | Forward   | TTCCGTTGGAATTCGCTTTA    |
| EIF45248                                                                                          | beta-galactosidase                                  | W54X_R       | Reverse   | AGTGGTCCTACGCGAGAGTG    |
| EIF45249                                                                                          | nitrate reductase                                   | AHIQ303_A1_F | Forward   | AAAATGGCGCTGTCTTCACT    |
| EIF45249                                                                                          | nitrate reductase                                   | AHIQ303_A1_R | Reverse   | CATCTGTCCGATTGTGTTGG    |
| EIF45250                                                                                          | nitrite reductase                                   | W53X_F       | Forward   | GCCTCGTCTGGTAAAGCATC    |
| EIF45250                                                                                          | nitrite reductase                                   | W53X_R       | Reverse   | CCTAAAGCCGGGAATACCTC    |
| EIF45251                                                                                          | nitrate transporter                                 | AHIQ303_B1_R | Reverse   | CTATTCGCATGGCTTGGATT    |
| EIF45251                                                                                          | nitrate transporter                                 | AHIQ303_B2_R | Reverse   | GGCGGTGGTTAATCAGAGAA    |
| EIF45252                                                                                          | maltase                                             | AHIQ303_C1_F | Forward   | GCTCCATGGTAATGGTGTCC    |
| EIF45252                                                                                          | maltase                                             | AHIQ303_C1_R | Reverse   | GAGACAACCCAGAATGGTG     |
| EIF45265                                                                                          | hypothetical protein AWRI1499_4878                  | W29_F        | Forward   | GCAACAGTTTCCTTTGCTGA    |
| EIF45265                                                                                          | hypothetical protein AWRI1499_4878                  | W29_R        | Reverse   | TCTGAGAGTAGCAGCGAGGAG   |
| EIF45400                                                                                          | carbohydrate esterase family 9 protein              | AHIQ280_A1_F | Forward   | GGGAGTTCACCTCTGAATGC    |
| EIF45400                                                                                          | carbohydrate esterase family 9 protein              | AHIQ280_A1_R | Reverse   | CGGCAGGAACTGCTCTTACTA   |
| EIF45401                                                                                          | carbohydrate esterase family 9 protein              | AHIQ280_B1_F | Forward   | CACCTTGACGACCATTTCT     |
| EIF45401                                                                                          | carbohydrate esterase family 9 protein              | AHIQ280_B1_R | Reverse   | AAGGAAAATATGTACACCCAGGA |
| EIF45403                                                                                          | carbohydrate esterase family 9 protein              | AHIQ280_C1_F | Forward   | GACCTGTTGGGGAAGATTCA    |
| EIF45403                                                                                          | carbohydrate esterase family 9 protein              | AHIQ280_C1_R | Reverse   | CGTTCGTCTATTGCATGAGC    |
| EIF45404                                                                                          | mfs drug transporter                                | EIF45404_F   | Forward   | TCCCATCCTTATGGTGTGGT    |
| EIF45404                                                                                          | mfs drug transporter                                | EIF45404_R   | Reverse   | ATGCTGCATCCAAAAGATCC    |
| EIF45405                                                                                          | putative mfs-mdr transporter                        | EIF45405_F   | Forward   | CGGCCGAAACTAATGGATAA    |
| EIF45405                                                                                          | putative mfs-mdr transporter                        | EIF45405_R   | Reverse   | AACGAAGCAAAGGGTAAAA     |
| EIF45406                                                                                          | mfs multidrug                                       | EIF4606_F    | Forward   | GACCTGTTGGGGAAGATTCA    |
| EIF45406                                                                                          | mfs multidrug                                       | EIF4606_R    | Reverse   | CTGCTGTCCAAGTGTGCAAT    |
| EIF45407                                                                                          | high-affinity glucose transporter                   | EIF45407_F   | Forward   | TTTATCACCATGCGCCTGTA    |
| EIF45407                                                                                          | high-affinity glucose transporter                   | EIF45407_R   | Reverse   | ACAGTTGCTCCCGTCTATGG    |
| EIF45408                                                                                          | galactose-1-phosphate uridylyltransferase           | EIF45408_F   | Forward   | AAAGGTGCTGCTATGGGTTG    |
| EIF45408                                                                                          | galactose-1-phosphate uridylyltransferase           | EIF45408_R   | Reverse   | AAAATGGAGCCTGATGGAGA    |

|          |                                    |                     |         |                          |
|----------|------------------------------------|---------------------|---------|--------------------------|
| EIF45409 | galactokinase                      | W52Y_F              | Forward | TCAGTCGTGAAATGAACCAAA    |
| EIF45409 | galactokinase                      | W52Y_R              | Reverse | TAAGCGCTTTACCCCTGAAA     |
| EIF45410 | gal10 bifunctional protein         | EIF45410_F          | Forward | ATGGAGAATCGCCTTGCTTA     |
| EIF45410 | gal10 bifunctional protein         | EIF45410_R          | Reverse | TTACCGGTACCCAAGTTCCA     |
| EIF45411 | dt dp-glucose -dehydratase         | W28A                | Forward | GGCGGACGCATTCTAATAAA     |
| EIF45411 | dt dp-glucose -dehydratase         | W28A                | Reverse | TTTGTCCGGTCTCCAGATTT     |
| EIF45412 | hexose transporter                 | EIF45412_F          | Forward | CTTCCAGAAATACCCGCTTG     |
| EIF45412 | hexose transporter                 | EIF45412_R          | Reverse | TTCCAGAATCTCCTCGTTGG     |
| EIF45413 | maltase                            | AHIQ280_D1_F        | Forward | TCTGGAGACCTCCAAAAGGA     |
| EIF45413 | maltase                            | AHIQ280_D1_F        | Reverse | TTTTCTCCCCCATCAGAGTG     |
| EIF45414 | multidrug resistance regulator 1   | EIF45414_F          | Forward | ACCACCTGATAGGCGAAATG     |
| EIF45414 | multidrug resistance regulator 1   | EIF45414_R          | Reverse | ACCGTAGCGATGTCGAGTCT     |
| EIF45415 | beta-glucosidase                   | AHIQ280_E1_F        | Forward | GTGCCACTGCTGAAACAGAA     |
| EIF45415 | beta-glucosidase                   | AHIQ280_E1_F        | Reverse | TGGCCCTAATGGAATCAGAG     |
| EIF45416 | hexose transporter                 | EIF45416_F          | Forward | TCGTGGTACTTGGGAGCAAT     |
| EIF45416 | hexose transporter                 | EIF45416_R          | Reverse | CTCGTGGCTTGTCTCTCTT      |
| EIF45417 | hypothetical protein AWRI1499_4714 | W51_F               | Forward | GAAGGAGGATGAGGGAGAGG     |
| EIF45417 | hypothetical protein AWRI1499_4714 | W51_R               | Reverse | TGCCTCTTAGAGAGTGAGAATCG  |
| EIF45955 | hypothetical protein AWRI1499_4159 | W89_F               | Forward | CGAGATCCTCGCTTAGCAGT     |
| EIF45955 | hypothetical protein AWRI1499_4159 | W89_R               | Reverse | GCGAGGATGTGATGCTGTTA     |
| EIF45984 | hypothetical protein AWRI1499_4155 | W88_F               | Forward | CTAAGAGAAAAGAAATGGCAAAGC |
| EIF45984 | hypothetical protein AWRI1499_4155 | W88_R               | Reverse | CAGGAAGAGTGCTTGTCTCTTTT  |
| EIF46173 | hypothetical protein AWRI1499_3976 | W49_F               | Forward | GTGAGCAAGCGAAGGAAGTT     |
| EIF46173 | hypothetical protein AWRI1499_3976 | W49_R               | Reverse | TCTGCCTTTTCCCTTGCTTTT    |
| EIF46260 | hypothetical protein AWRI1499_3842 | W87_F               | Forward | CCAATATGGCCAGAACCAAT     |
| EIF46260 | hypothetical protein AWRI1499_3842 | W87_R               | Reverse | GGGACATCAGGTGAGATTGCG    |
| EIF46377 | hypothetical protein AWRI1499_3738 | W23_F               | Forward | TGAAGCAGGAGAATGAGGAGA    |
| EIF46377 | hypothetical protein AWRI1499_3738 | W23_R               | Reverse | GCCTCTGGAGCTGAGTTTTG     |
| EIF46396 | putative pyridoxine transport      | EIF46396_F          | Forward | TTCAACGGGAGGTATTCTCG     |
| EIF46396 | putative pyridoxine transport      | EIF46396_R          | Reverse | TGGTCCCAACAAAGATGTGA     |
| EIF46397 | hypothetical protein AWRI1499_3706 | EIF46397_F          | Forward | CTGTTAGCAGCGGTGGTATG     |
| EIF46397 | hypothetical protein AWRI1499_3706 | EIF46397-R          | Reverse | TATTGTTGCAGCGCTGATTT     |
| EIF46398 | hypothetical protein AWRI1499_3707 | EIF46398_inclIntron | Forward | TTGCTGCTCTTCCGTTCTTT     |
| EIF46398 | hypothetical protein AWRI1499_3707 | EIF46398_inclIntron | Reverse | AATGGCGATCCAAAGTCAAG     |
| EIF46399 | pantothenate transporter fen2      | EIF46399_F          | Forward | TGGGGACTTTTACTCTTGG      |
| EIF46399 | pantothenate transporter fen2      | EIF46399_R          | Reverse | CATGAACCCGGAAAAATATGG    |
| EIF46400 | upf0145 protein                    | EIF46400_F          | Forward | TCCCTCACCAATTGATCCAC     |
| EIF46400 | upf0145 protein                    | EIF46400_R          | Reverse | GCATTGGGAAAAATCGAGAAA    |
| EIF46480 | aspartate aminotransferase         | AHIQ207_A1_F        | Forward | CTGGGAAGGAGACAAAACAG     |
| EIF46480 | aspartate aminotransferase         | AHIQ207_A1_R        | Reverse | ATGTACGGCGAAAGAATTGG     |
| EIF47162 | hypothetical protein AWRI1499_2925 | W44_F               | Forward | CCAAGGAAGACCTCAGATGC     |
| EIF47162 | hypothetical protein AWRI1499_2925 | W44_R               | Reverse | TTAAAATCCTGGGCCACCT      |
| EIF47495 | hypothetical protein AWRI1499_2613 | W67_F               | Forward | AAATGGTGCCAGAAACATC      |
| EIF47495 | hypothetical protein AWRI1499_2613 | W67_R               | Reverse | AGACGAAGTCTTGACAGAAGTGG  |
| EIF47553 | hypothetical protein AWRI1499_2542 | EIF47553_F          | Forward | TTCAAGTTCGAATCAAAAATGG   |
| EIF47553 | hypothetical protein AWRI1499_2542 | EIF47553_R          | Reverse | TTTGAAGATAGACGCTTGATTTG  |
| EIF47624 | hypothetical protein AWRI1499_2416 | W39_F               | Forward | TCGTGGCATGCTGTTAGTA      |
| EIF47624 | hypothetical protein AWRI1499_2416 | W39_R               | Reverse | CGTATCCCAAGAATACGTCTGA   |
| EIF47692 | longevity-assurance protein 1      | AHIQ132_A1_F        | Forward | GCTGCTAACGCACACTACCA     |

|                |                                                                                     |                       |         |                         |
|----------------|-------------------------------------------------------------------------------------|-----------------------|---------|-------------------------|
| EIF47692       | longevity-assurance protein 1                                                       | AHIQ132_A1_R          | Reverse | GCATCCTCCTTGCTCATC      |
| EIF47710       | bleomycin resistance                                                                | AHIQ131_A1_F          | Forward | CCAGGTGTCCTGTCTGGTTT    |
| EIF47710       | bleomycin resistance                                                                | AHIQ131_A1_R          | Reverse | TTTTCGACATTCCTCGGCTCT   |
| EIF47726       | nadph-dependent 1-acyldihydroxyacetone phosphate reductase                          | AHIQ130_A1_F          | Forward | TAGCGGAGGAACTTGCAAAAC   |
| EIF47726       | nadph-dependent 1-acyldihydroxyacetone phosphate reductase                          | AHIQ130_A1_R          | Reverse | GGAAAGTAGGCAGCCACAAA    |
| EIF47731       | apoptosis-inducing taf9-like domain 1 family                                        | AHIQ129_A1_F          | Forward | TCAAGGGTCAGACAGTCCAA    |
| EIF47731       | apoptosis-inducing taf9-like domain 1 family                                        | AHIQ129_A1_R          | Reverse | TCCTCCTCCTCCTCCTCTTC    |
| EIF47810       | hypothetical protein AWRI1499_2284                                                  | EIF47810_F            | Forward | TCTACCACACCCATCATCCA    |
| EIF47810       | hypothetical protein AWRI1499_2284                                                  | EIF47810_R            | Reverse | CCGTCCGTTCCACTTAAACA    |
| EIF47995       | hypothetical protein AWRI1499_2081                                                  | W32A_F                | Forward | CTTTATCCTTGGTCTCCTCAGC  |
| EIF47995       | hypothetical protein AWRI1499_2081                                                  | W32A_R                | Reverse | ATGACCCAAAGTGAGGCAGT    |
| EIF47999       | serine threonine-protein kinase nrc-2                                               | AHIQ112_A1_F          | Forward | GATGTTGGCAAAGGTCTCGT    |
| EIF47999       | serine threonine-protein kinase nrc-2                                               | AHIQ112_A1_R          | Reverse | CTAGGCTCGTCGACCTCATC    |
| EIF48066       | cytochrome c                                                                        | AHIQ107_A1_F          | Forward | TGGCTGCTCCATACAAGAAA    |
| EIF48066       | cytochrome c                                                                        | AHIQ107_A1_R          | Reverse | CAGCCAAGTATGCAACAAGGT   |
| EIF48111       | hypothetical protein AWRI1499_1959                                                  | W63_F                 | Forward | TGGAGTTGAAGCAGTTGAGG    |
| EIF48111       | hypothetical protein AWRI1499_1959                                                  | W63_R                 | Reverse | CATTCTCTTCAACTTCCTCTTTG |
| EIF48158       | hypothetical protein AWRI1499_1924                                                  | W31A_F                | Forward | CATGGAATCGTTAGGGATGG    |
| EIF48158       | hypothetical protein AWRI1499_1924                                                  | W31A_R                | Reverse | TTTTGCACCCCTCTTTCTTG    |
| EIF48830       | hypothetical protein AWRI1499_1218                                                  | EIF48830_InclIntron_F | Forward | GCCACGACAGAGGAAGAATG    |
| EIF48830       | hypothetical protein AWRI1499_1218                                                  | EIF48830_InclIntron_R | Reverse | TGCGTCCCAATGTTAGAGAA    |
| EIF49042       | glutamate synthase                                                                  | AHIQ68_A1_F           | Forward | TCGATGCCCGATAAGTTCAT    |
| EIF49042       | glutamate synthase                                                                  | AHIQ68_A1_R           | Reverse | ACAATCCGACCCTTCACAGT    |
| EIF49054       | thiamine biosynthesis                                                               | AHIQ66_A1_F           | Forward | CGCAACTTTTCATTCTGTGC    |
| EIF49054       | thiamine biosynthesis                                                               | AHIQ66_A1_R           | Reverse | TGCGAACAAGTTTTCTCTCT    |
| EIF49314       | peptide-n4-(n-acetyl-beta-d-glucosaminy) asparaginase amidase                       | AHIQ58_A1_F           | Forward | TTCAACGTGTCGCTAGATGC    |
| EIF49314       | peptide-n4-(n-acetyl-beta-d-glucosaminy) asparaginase amidase                       | AHIQ58_A1_R           | Reverse | GAGTCAGGCGGAAGAGATTG    |
| EIF49824       | nadph-dependent medium chain alcohol dehydrogenase with broad substrate specificity | AHIQ15_A1_F           | Forward | GGCTTACCCAGACACTTTCCG   |
| EIF49824       | nadph-dependent medium chain alcohol dehydrogenase with broad substrate specificity | AHIQ15_A1_R           | Reverse | CCTGGAAAGGCATCATCAAAA   |
| X9085_gene1239 | -                                                                                   | X9085_gene1239_F      | Forward | ACATGGTGCAATCAATCCTG    |
| X9085_gene1239 | -                                                                                   | X9085_gene1239_R      | Reverse | ATCATCAGCATGACCAACCA    |
| X9085_gene1241 | DEHA2G12782p                                                                        | X9085_gene1241_F      | Forward | GCGTTGATTTTTGAGAGCACA   |
| X9085_gene1241 | DEHA2G12782p                                                                        | X9085_gene1241_R      | Reverse | AGACCCTGTTACCTTGCAT     |
| X9085_gene1242 | protein BMH2                                                                        | X9085_gene1242_F      | Forward | TGAGCAAAGGAGGAGGCTA     |
| X9085_gene1242 | protein BMH2                                                                        | X9085_gene1242_R      | Reverse | CATGTCCGAAGTCCACAATG    |
| X9085_gene1243 | Shuttling pre-60S factor                                                            | X9085_gene1243_F      | Forward | TGCAACCAACTGGACCATTA    |
| X9085_gene1243 | Shuttling pre-60S factor                                                            | X9085_gene1243_R      | Reverse | GTAATGCCGAAATGCCAAGT    |

|                |                                                                                    |                  |         |                        |
|----------------|------------------------------------------------------------------------------------|------------------|---------|------------------------|
| X9085_gene1637 | -                                                                                  | X9085_gene1637_F | Forward | GCCATTGGTCATGGAAAAGTT  |
| X9085_gene1637 | -                                                                                  | X9085_gene1637_R | Reverse | CGTCAATGACCCGTTTGTTA   |
| X9085_gene172  | -                                                                                  | X9085_gene172_F  | Forward | CCGATGTTTGCATTGTCAAG   |
| X9085_gene172  | -                                                                                  | X9085_gene172_R  | Reverse | AGCACAGCTTCCTTCCAAAA   |
| X9085_gene173  | -                                                                                  | X9085_gene173_F  | Forward | TGCTATCACGGGGATACAGAT  |
| X9085_gene173  | -                                                                                  | X9085_gene173_R  | Reverse | CACGCTGCCTAGGACTTGTA   |
| X9085_gene2    | -                                                                                  | B1_F             | Forward | GCAACCAAGAAAAAGACAAGG  |
| X9085_gene2    | -                                                                                  | B1_R             | Reverse | AGTGCATGCAGTAAATGTTG   |
| X9085_gene2206 | hypothetical protein                                                               | X9085_gene2206_F | Forward | TGGGGAGGTTAAATTTGCTG   |
| X9085_gene2206 | hypothetical protein                                                               | X9085_gene2206_R | Reverse | TGGTCTGATTGGAAGCCATT   |
| X9085_gene2208 | N-acetyltransferase 9 isoform 2                                                    | X9085_gene2208_F | Forward | TTGAGAATATGCCAGCTTTGG  |
| X9085_gene2208 | N-acetyltransferase 9 isoform 2                                                    | X9085_gene2208_R | Reverse | TTTTTCCATGCGAATTATGG   |
| X9085_gene2432 | -                                                                                  | X9085_gene2432_F | Forward | CGAGAAAGATGGGGATACGA   |
| X9085_gene2432 | -                                                                                  | X9085_gene2432_R | Reverse | TCAAAGCCTCTGGAACGTCT   |
| X9085_gene2697 | -                                                                                  | X9085_gene2697_F | Forward | CTTCTGCTTTGGCTTCTGCT   |
| X9085_gene2697 | -                                                                                  | X9085_gene2697_R | Reverse | AAACCAGCACCGACGAAA     |
| X9085_gene2883 | -                                                                                  | X9085_gene2883_F | Forward | TGGCTGAAGAAACAAAAGCTG  |
| X9085_gene2883 | -                                                                                  | X9085_gene2883_R | Reverse | TACCCTCACCTTCTTCTCG    |
| X9085_gene3    | -                                                                                  | B1_F             | Forward | GCAACCAAGAAAAAGACAAGG  |
| X9085_gene3    | -                                                                                  | B1_R             | Reverse | AGTGCATGCAGTAAATGTTG   |
| X9085_gene3090 | DEHA2E17446p                                                                       | X9085_gene3090_F | Forward | AGAGCCAAACGTGAGGAGAA   |
| X9085_gene3090 | DEHA2E17446p                                                                       | X9085_gene3090_R | Reverse | CCCCTTGATCAGATGCACTT   |
| X9085_gene3668 | -                                                                                  | X9085_gene3668_F | Forward | AGGGACGTTTATGGCACAAG   |
| X9085_gene3668 | -                                                                                  | X9085_gene3668_R | Reverse | ACTTTGAGACCGCCCGTTAC   |
| X9085_gene4    | -                                                                                  | B1_F             | Forward | GCAACCAAGAAAAAGACAAGG  |
| X9085_gene4    | -                                                                                  | B1_R             | Reverse | AGTGCATGCAGTAAATGTTG   |
| X9085_gene4202 | hypothetical protein                                                               | X9085_gene4202_F | Forward | AAGTCAACGCAGGCTCTCAT   |
| X9085_gene4202 | hypothetical protein                                                               | X9085_gene4202_R | Reverse | CTTCTCGCTCTCCCTTTTT    |
| X9085_gene4419 | -                                                                                  | X9085_gene4419_F | Forward | ACCACAGCAGCAGTTGGAG    |
| X9085_gene4419 | -                                                                                  | X9085_gene4419_R | Reverse | AGCGTTTTTAGCCACAGGAG   |
| X9085_gene4860 | -                                                                                  | X9085_gene4860_F | Forward | ATATTCCGATTGGGGGAATC   |
| X9085_gene4860 | -                                                                                  | X9085_gene4860_R | Reverse | TCGAGCTGGTATCTTGCTGA   |
| X9085_gene4861 | -                                                                                  | X9085_gene4861_F | Forward | CATGCGAGAACGTTGAAAGA   |
| X9085_gene4861 | -                                                                                  | X9085_gene4861_R | Reverse | TCACCTTGTTTTCCAATTTGTT |
| X9085_gene4876 | Nuclear SAM-dependent mono-and asymmetric arginine dimethylating methyltransferase | X9085_gene4876_F | Forward | TTACGAATCCATGCTGGACA   |
| X9085_gene4876 | Nuclear SAM-dependent mono-and asymmetric arginine dimethylating methyltransferase | X9085_gene4876_R | Reverse | CGTTCTTTGGGGAGTCAGAA   |
| X9085_gene4877 | GTPase                                                                             | X9085_gene4877_F | Forward | TCATCGCAGCAACTTTTGAC   |
| X9085_gene4877 | GTPase                                                                             | X9085_gene4877_R | Reverse | TATCTTCCCCACCACTTTGC   |
| X9085_gene4952 | TFIIH basal transcription factor complex subunit 2                                 | X9085_gene4952_F | Forward | GGCTTCAGGCACTACACACA   |
| X9085_gene4952 | TFIIH basal transcription factor complex subunit 2                                 | X9085_gene4952R  | Reverse | CGACAAGCAGTACGAGTCCA   |
| X9085_gene4987 | mitochondrial ribosomal protein L11                                                | X9085_gene4987_F | Forward | CACAGATGTGCCGATCAAGT   |
| X9085_gene4987 | mitochondrial ribosomal protein L11                                                | X9085_gene4987R  | Reverse | ACACCCTTGACACATCCTT    |
| X9085_gene5044 | -                                                                                  | X9085_gene5044_F | Forward | TGGAAAGGGGAGTACAGACCA  |



|                |                                                         |                                             |         |                        |
|----------------|---------------------------------------------------------|---------------------------------------------|---------|------------------------|
| X9085_gene5044 | -                                                       | X9085_gene5044_R                            | Reverse | CATCATCACCGTCATCATCA   |
| X9085_gene5174 | -                                                       | X9085_gene5174_F                            | Forward | CAAATGCAGCAACAACAACC   |
| X9085_gene5174 | -                                                       | X9085_gene5174_R                            | Reverse | TTAAAATCCTGGGCCACCT    |
| X9085_gene5208 | Cox2p                                                   | X9085_gene5208_F                            | Forward | GATGCAGTTCAGGTCGTTT    |
| X9085_gene5208 | Cox2p                                                   | X9085_gene5208_R                            | Reverse | GGCATAGATGAATGCATAACAC |
| X9085_gene5217 | -                                                       | X9085_gene5217_F                            | Forward | GATCAAGATGCCTCGGTTTC   |
| X9085_gene5217 | -                                                       | X9085_gene5217_R                            | Reverse | GCAATTTGCGGTGCTTCTAT   |
| X9085_gene5218 | -                                                       | X9085_gene5218_F                            | Forward | CAGTTCCAGATGGGTCACATT  |
| X9085_gene5218 | -                                                       | X9085_gene5218_R                            | Reverse | GCATAGCCCTGTTGATTCTGT  |
| X9085_gene5231 | copia protein-like                                      | X9085_gene5231_F                            | Forward | TAAAGCTGCGAGTTGTCTGT   |
| X9085_gene5231 | copia protein-like                                      | X9085_gene5231_R                            | Reverse | TCGCTGGAATGTAAGCAGTG   |
| X9085_gene1048 | Autophagy-related protein 12                            | X9085_gene1048_F                            | Forward | GCGATGAGGATGAGGATGAT   |
| X9085_gene1048 | Autophagy-related protein 12                            | X9085_gene1048_R                            | Reverse | CAACTCGCTATCTCCCGATT   |
| X9085_gene1561 | -                                                       | X9085_gene1561_F                            | Forward | CGTGCGAAGAACGTTTATGA   |
| X9085_gene1561 | -                                                       | X9085_gene1561_R                            | Reverse | TCTTCTCCAACCCCATCTTG   |
| X9085_gene2040 | -                                                       | X9085_gene2040_F                            | Forward | GGATTGCCAGAAAACCTGGAC  |
| X9085_gene2040 | -                                                       | X9085_gene20402_R                           | Reverse | AAACTTGGCTGCATTTCTCC   |
| X9085_gene2356 | Conserved hypothetical protein                          | X9085_gene2356_F                            | Forward | TGAGCGCAGTGATAGCAAAC   |
| X9085_gene2356 | Conserved hypothetical protein                          | X9085_gene2356_R                            | Reverse | ATGATATCCGGTTGGCATGT   |
| X9085_gene2436 | SPAPADRAFT_58771<br>hypothetical protein                | X9085_gene2436_F                            | Forward | CAGCATCGAAAGTGGCAGT    |
| X9085_gene2436 | SPAPADRAFT_58771                                        | X9085_gene2436_R                            | Reverse | CACCTGCACCTCTAAACACG   |
| X9085_gene2697 | -                                                       | X9085_gene2697_F                            | Forward | CTTCTGCTTTGGCTTCTGCT   |
| X9085_gene2697 | -                                                       | X9085_gene2697_R                            | Reverse | AAACCAGCACCGACGAAA     |
| X9085_gene2842 | -                                                       | X9085_gene2842_F                            | Forward | TTGCCTTGGAGGAAGAACTG   |
| X9085_gene2842 | -                                                       | X9085_gene2842_R                            | Reverse | CCACCGAATTATCAAAGTCCA  |
| X9085_gene2883 | -                                                       | X9085_gene2883_F                            | Forward | TGGCTGAAGAAACAAAAGCTG  |
| X9085_gene2883 | -                                                       | X9085_gene2883_R                            | Reverse | TACCCTCACCTTCCTTCTCG   |
| X9085_gene3697 | -                                                       | X9085_gene3697_F                            | Forward | AGCGACCCGTCAGAATACAC   |
| X9085_gene3697 | -                                                       | X9085_gene3697_R                            | Reverse | AGAGCCAACAGCAGCAGAAAT  |
| X9085_gene4359 | -                                                       | X9085_gene4359_F                            | Forward | GGCACTGATATCGGCAAAAA   |
| X9085_gene4359 | -                                                       | X9085_gene4359_R                            | Reverse | AAAACGAGTTCTGGCTGCTT   |
| X9085_gene4419 | -                                                       | X9085_gene4419_F                            | Forward | ACCACAGCAGCAGTTGGAG    |
| X9085_gene4419 | -                                                       | X9085_gene4419_R                            | Reverse | AGCGTTTTTAGCCACAGGAG   |
| X9085_gene4593 | Mitochondrial ribosomal protein of the<br>large subunit | X9085_gene4593_F                            | Forward | CGATCCTTTTGGATCAGAGG   |
| X9085_gene4593 | Mitochondrial ribosomal protein of the<br>large subunit | X9085_gene4593_R                            | Reverse | TGCCCTGGAATGTCTATCAA   |
| X9085_gene4903 | -                                                       | X9085_gene4903_F                            | Forward | GATGGGATTACGCTGGAAGA   |
| X9085_gene4903 | -                                                       | X9085_gene4903_R                            | Reverse | GCGGAAGCTTCTGTGTTTCT   |
| X9085_gene5174 | -                                                       | X9085_gene5174_F                            | Forward | CAAATGCAGCAACAACAACC   |
| X9085_gene5174 | -                                                       | X9085_gene5174_R                            | Reverse | TTAAAATCCTGGGCCACCT    |
| CE57870_27783  | Nitrate transporter                                     | CE57870_27783_F                             | Forward | GGCGGTGGTTAATCAGAGAA   |
| CE57870_27783  | Nitrate transporter                                     | CE57870_27783_R                             | Reverse | AGCGCAACAACAATGATG     |
| gm1.2653_g     | -                                                       | gm1.2653_g_F                                | Forward | AAACTTGCAGCTGCTGATGA   |
| gm1.2653_g     | -                                                       | gm1.2653_g_R                                | Reverse | GCTCGAGTTAGTCGAAGCGTA  |
| gm1.2653_g     | Nitrite reductase [NAD(P)H] large<br>subunit, NirD      | fgenesh1_kg.24_#_3_#_Locus2869v1rpkm42.70_F | Forward | GGTGCCCGTGCTCTATTTA    |

|                                             |                                                   |                                               |         |                       |
|---------------------------------------------|---------------------------------------------------|-----------------------------------------------|---------|-----------------------|
| fgenes1_kg.24_#_3_#_Locus2869v1rpkm42.70    | Nitrite reductase [NAD(P)H] large subunit, NirD   | fgenes1_kg.24_#_3_#_Locus2869v1rpkm42.70_R    | Reverse | TTCAGCTCGCTTTCCAAAAT  |
| fgenes1_kg.17_#_19_#_Locus4180v1rpkm7.35    | NAD-dependent epimerase/dehydratase               | fgenes1_kg.17_#_19_#_Locus4180v1rpkm7.35_F    | Forward | ATGTTTGTCCGGTCTCCAGA  |
| fgenes1_kg.17_#_19_#_Locus4180v1rpkm7.35    | NAD-dependent epimerase/dehydratase               | fgenes1_kg.17_#_19_#_Locus4180v1rpkm7.35_R    | Reverse | TCTACTGCCTCCCCAGATTG  |
| fgenes1_kg.19_#_13_#_Locus985v1rpkm163.02   | -                                                 | fgenes1_kg.19_#_13_#_Locus985v1rpkm163.02_F   | Forward | TCGTTTCGCCTGTATTCTCT  |
| fgenes1_kg.19_#_13_#_Locus985v1rpkm163.02   | -                                                 | fgenes1_kg.19_#_13_#_Locus985v1rpkm163.02_R   | Reverse | CGCTTGACTGTTTTGCACAT  |
| fgenes1_kg.17_#_17_#_Locus4025v1rpkm10.11   | Galactose-1-phosphate uridyl transferase, class I | fgenes1_kg.17_#_17_#_Locus4025v1rpkm10.11_F   | Forward | TCTCCATCAGGCTCCATTTT  |
| fgenes1_kg.17_#_17_#_Locus4025v1rpkm10.11   | Galactose-1-phosphate uridyl transferase, class I | fgenes1_kg.17_#_17_#_Locus4025v1rpkm10.11_R   | Reverse | CCCGCAGTTGGAAGTTGTAT  |
| CE13834_2308                                | Retrotransposon gag protein                       | CE13834_2308_F                                | Forward | AGTTTGCCTTAGCCGACAAC  |
| CE13834_2308                                | Retrotransposon gag protein                       | CE13834_2308_R                                | Reverse | AGAAGACGGAAGCGGAAGTT  |
| fgenes1_pg.18_#_5                           | Protein of unknown function DUF74                 | fgenes1_pg.18_#_5_F                           | Forward | GCATTGGGAAAATCGAGAAA  |
| fgenes1_pg.18_#_5                           | Protein of unknown function DUF74                 | fgenes1_pg.18_#_5_R                           | Reverse | CACACCGTTCCGCAATAAC   |
| e_gw1.1.1978.1                              | Ribosomal protein L2                              | e_gw1.1.1978.1_F                              | Forward | GCCACAACCCAGATGAGAAC  |
| e_gw1.1.1978.1                              | Ribosomal protein L2                              | e_gw1.1.1978.1_R                              | Reverse | CTCCTCAAGAGCCTTCTCCTT |
| gm1.1418_g                                  | SMP-30/Gluconolactonase/LRE-like region           | gm1.1418_g_F                                  | Forward | GCGGATAGTTCAGTGGGTGT  |
| gm1.1418_g                                  | SMP-30/Gluconolactonase/LRE-like region           | gm1.1418_g_R                                  | Reverse | GATCTGCATCTGGCTCATCA  |
| e_gw1.4.652.1                               | Alcohol dehydrogenase, zinc-binding               | e_gw1.4.652.1_F                               | Forward | CGATGGGACTCTTTGTCTGTT |
| e_gw1.4.652.1                               | Alcohol dehydrogenase, zinc-binding               | e_gw1.4.652.1_R                               | Reverse | CAAGCTAGAAGGACCCGGA   |
| fgenes1_pg.5_#_301                          | Shr3 amino acid permease chaperone                | fgenes1_pg.5_#_301_F                          | Forward | GATCGCATCATGTTCCGTAAT |
| fgenes1_pg.5_#_301                          | Shr3 amino acid permease chaperone                | fgenes1_pg.5_#_301_R                          | Reverse | CCCCTTTGTCTTTCTGGA    |
| gm1.3526_g                                  | 6-phosphogluconate dehydrogenase, C-terminal-like | gm1.3526_g_F                                  | Forward | ATTGTGGCGAAGAACAGCTT  |
| gm1.3526_g                                  | 6-phosphogluconate dehydrogenase, C-terminal-like | gm1.3526_g_R                                  | Reverse | GTCCGTTTTCTGCCTCATGT  |
| fgenes1_kg.7_#_28_#_Locus3256v1rpkm30.45    | Inner centromere protein, ARK binding region      | fgenes1_kg.7_#_28_#_Locus3256v1rpkm30.45_F    | Forward | CGATTGGCAGAGAGGAAAAG  |
| fgenes1_kg.7_#_28_#_Locus3256v1rpkm30.45    | Inner centromere protein, ARK binding region      | fgenes1_kg.7_#_28_#_Locus3256v1rpkm30.45_R    | Reverse | TTGGATCTTCAATCGTTCC   |
| fgenes1_pg.8_#_19                           | Peptidase aspartic, catalytic                     | fgenes1_pg.8_#_19_F                           | Forward | GGGACCCCTTATCTCACAT   |
| fgenes1_pg.8_#_19                           | Peptidase aspartic, catalytic                     | fgenes1_pg.8_#_19_R                           | Reverse | GTGGCTTGTCGTGTAAGT    |
| estExt_Genewise1Plus.C_90065                | Cyclin, N-terminal                                | estExt_Genewise1Plus.C_90065_F                | Forward | GCCGATCTTCGTGTTCTAGC  |
| estExt_Genewise1Plus.C_90065                | Cyclin, N-terminal                                | estExt_Genewise1Plus.C_90065_R                | Reverse | CCTTAATCTGGCGCTTCTTG  |
| fgenes1_pg.10_#_55                          | Arginase                                          | fgenes1_pg.10_#_55_F                          | Forward | TGGAGTTGAACAAGCACCAG  |
| fgenes1_pg.10_#_55                          | Arginase                                          | fgenes1_pg.10_#_55_R                          | Reverse | GAGTACCAGTTGCAGCGACA  |
| fgenes1_kg.11_#_4_#_Locus4839v2rpkm0.09_PRE | Biotin synthase                                   | fgenes1_kg.11_#_4_#_Locus4839v2rpkm0.09_PRE_F | Forward | AAAGGTGCAACCAGTTTTTG  |
| fgenes1_kg.11_#_4_#_Locus4839v2rpkm0.09_PRE | Biotin synthase                                   | fgenes1_kg.11_#_4_#_Locus4839v2rpkm0.09_PRE_R | Reverse | GAAGGATTTTCATCGGAACGA |
| estExt_Genewise1Plus.C_120009               | Imidazole glycerol-phosphate dehydratase          | estExt_Genewise1Plus.C_120009_F               | Forward | CGGTCATCGATATCGGTCTT  |
| estExt_Genewise1Plus.C_120009               | Imidazole glycerol-phosphate dehydratase          | estExt_Genewise1Plus.C_120009_R               | Reverse | AGAATGGCCTGAACAAGGTG  |
| estExt_Genemark1.C_130002                   | mRNA splicing factor, Cwf21                       | estExt_Genemark1.C_130002_F                   | Forward | TCATACAACGGGATCGGATT  |
| estExt_Genemark1.C_130002                   | mRNA splicing factor, Cwf21                       | estExt_Genemark1.C_130002_r                   | Reverse | CTCTTCGGGCTTCCCTTACT  |
| fgenes1_kg.14_#_20_#_Locus994v1rpkm161.74   | Glutathione reductase, animal and                 | fgenes1_kg.14_#_20_#_Locus994v1rpkm161.74_F   | Forward | TTGTTGACGCTTTGTTCTGG  |

|                                           |                                                          |                                             |         |                       |
|-------------------------------------------|----------------------------------------------------------|---------------------------------------------|---------|-----------------------|
| fgenes1_kg.14_#_20_#_Locus994v1rpkm161.74 | bacterial<br>Glutathione reductase, animal and bacterial | fgenes1_kg.14_#_20_#_Locus994v1rpkm161.74_R | Reverse | TGATGTTTCGTGTTGGCAAAT |
| gm1.5011_g                                | Fungal transcriptional regulatory protein, N-terminal    | gm1.5011_g_F                                | Forward | GCATGCCGTGAGAAGAAAAAT |
| gm1.5011_g                                | Fungal transcriptional regulatory protein, N-terminal    | gm1.5011_g_R                                | Reverse | CAGCTCCGTGTCCGTATTCT  |
| fgenes1_kg.16_#_33_#_Locus2982v1rpkm39.26 | Sulphate transporter                                     | fgenes1_kg.16_#_33_#_Locus2982v1rpkm39.26_F | Forward | TAGTGACGCTGGCCTTTTCT  |
| fgenes1_kg.16_#_33_#_Locus2982v1rpkm39.26 | Sulphate transporter                                     | fgenes1_kg.16_#_33_#_Locus2982v1rpkm39.26_R | Reverse | TGAAGAGCACCGAGTTTGTG  |
| fgenes1_pm.21_#_6                         | Homeobox                                                 | fgenes1_pm.21_#_6_F                         | Forward | CCATCCATGTGGATTGAGAA  |
| fgenes1_pm.21_#_6                         | Homeobox                                                 | fgenes1_pm.21_#_6_R                         | Reverse | CCTCATCTGAGATAGCGGAAC |
| gm1.5241_g                                | FAD dependent oxidoreductase                             | gm1.5241_g_F                                | Forward | GTTGTTGGTGCCGGAATATC  |
| gm1.5241_g                                | FAD dependent oxidoreductase                             | gm1.5241_g_R                                | Reverse | CCAGCTGTAGCTTCGACCTT  |
| e_gw1.23.26.1                             | -                                                        | e_gw1.23.26.1_F                             | Forward | TGGATGTTCCCAAAGCAGAT  |
| e_gw1.23.26.1                             | -                                                        | e_gw1.23.26.1_R                             | Reverse | TGGCACTAATCTCCCAAACC  |
| gm1.5276_g                                | Inositol polyphosphate related phosphatase               | gm1.5276_g_F                                | Forward | GGAGGGAAAGGTTGAGAAGG  |
| gm1.5276_g                                | Inositol polyphosphate related phosphatase               | gm1.5276_g_R                                | Reverse | ATTGCCTTGAAATCCTGGTG  |
| gw1.27.10.1                               | Molybdopterin dehydrogenase, FAD-binding                 | gw1.27.10.1_F                               | Forward | AATCGGGATGTAATGCTTGC  |
| gw1.27.10.1                               | Molybdopterin dehydrogenase, FAD-binding                 | gw1.27.10.1_R                               | Reverse | TTTCGCATCCGGATAGATTC  |
| estExt_Genewise1Plus.C_300001             | 6-phosphogluconate dehydrogenase, C-terminal-like        | estExt_Genewise1Plus.C_300001_F             | Forward | ATTGTGGCGAAGAACAGCTT  |
| estExt_Genewise1Plus.C_300001             | 6-phosphogluconate dehydrogenase, C-terminal-like        | estExt_Genewise1Plus.C_300001_R             | Reverse | GTCCGTTTTCTGCCTCATGT  |
| e_gw1.31.2.1                              | WD40 repeat                                              | e_gw1.31.2.1_F                              | Forward | GCATCAGGTGAAAAACACGA  |
| e_gw1.31.2.1                              | WD40 repeat                                              | e_gw1.31.2.1_R                              | Reverse | GGCGATCTTAGTGTCTTTCG  |
| estExtgenes1_pm.C_320002                  | Zinc finger, N-recognin                                  | estExt_fgenes1_pm.C_320002_F                | Forward | CAGCTGCAAAAAGCCATACA  |
| estExtgenes1_pm.C_320002                  | Zinc finger, N-recognin                                  | estExt_fgenes1_pm.C_320002_R                | Reverse | CCGGTTATTGCCTGCTCTAC  |
| gw1.35.3.1                                | Lysophospholipase, catalytic region                      | gw1.35.3.1_F                                | Forward | CAGCGATAACCCAATCAACA  |
| gw1.35.3.1                                | Lysophospholipase, catalytic region                      | gw1.35.3.1_R                                | Reverse | AGAAATCGGAAGAGCAAGCA  |
| gm1.5307_g                                | -                                                        | gm1.5307_g_F                                | Forward | GAGGCTGTTTTCTGCTTGC   |
| gm1.5307_g                                | -                                                        | gm1.5307_g_R                                | Reverse | GATGCTAGGCCATTCTGCTC  |
| gm1.5309_g                                | -                                                        | gm1.5309_g_F                                | Forward | CTGCTGTGCCCGTAGTAAG   |
| gm1.5309_g                                | -                                                        | gm1.5309_g_R                                | Reverse | CCTACCAGGCGTATCCAAAC  |
| gm1.5316_g                                | -                                                        | gm1.5316_g_F                                | Forward | AAAATTGTCAAGGCCCAAT   |
| gm1.5316_g                                | -                                                        | gm1.5316_g_R                                | Reverse | TGTCCAAGCCCGTCTTTATC  |
| MIX1345_2881_99                           | -                                                        | MIX1345_2881_99_F                           | Forward | CACAAGGAAAAGGCTGGTTT  |
| MIX1345_2881_99                           | -                                                        | MIX1345_2881_99_R                           | Reverse | CAAAAATGGTTCCGGATTCC  |
| fgenes1_kg.56_#_1_#_Locus2611v1rpkm50.81  | Sodium/hydrogen exchanger                                | fgenes1_kg.56_#_1_#_Locus2611v1rpkm50.81_F  | Forward | ACGCTCAGAACCCCATACAG  |
| fgenes1_kg.56_#_1_#_Locus2611v1rpkm50.81  | Sodium/hydrogen exchanger                                | fgenes1_kg.56_#_1_#_Locus2611v1rpkm50.81_R  | Reverse | CTGGAAAATGCCGAGAGAAC  |
| gm1.5337_g                                | Armadillo-type fold                                      | gm1.5337_g_F                                | Forward | GCAGTGAAGTACCACGGACA  |
| gm1.5337_g                                | Armadillo-type fold                                      | gm1.5337_g_R                                | Reverse | CTGCAGCTCCTTCAACTTCC  |
| e_gw1.20.48.1                             | Zinc/iron permease                                       | e_gw1.20.48.1_F                             | Forward | GCGTTTTTCCCCTTTTGTG   |
| e_gw1.20.48.1                             | Zinc/iron permease                                       | e_gw1.20.48.1_R                             | Reverse | AGCCTGGAGTCGTAAGACCA  |
| e_gw1.20.53.1                             | -                                                        | e_gw1.20.53.1_F                             | Forward | CAACTGGCGTTCTAAATCCAA |
| e_gw1.20.53.1                             | -                                                        | e_gw1.20.53.1_R                             | Reverse | CGGAAGGATCAACAACCTCA  |

|                                            |                                                       |                                              |         |                         |
|--------------------------------------------|-------------------------------------------------------|----------------------------------------------|---------|-------------------------|
| gm1.5197_g                                 | Cytochrome b5                                         | gm1.5197_g_F                                 | Forward | ATTGCAATCGACGGAGAAGT    |
| gm1.5197_g                                 | Cytochrome b5                                         | gm1.5197_g_R                                 | Reverse | GATCCTCGGCTTCCCTAATC    |
| gm1.5120_g                                 | Protein of unknown function DUF74                     | gm1.5120_g_F                                 | Forward | GGCCCTATTTCGAATCATCAA   |
| gm1.5120_g                                 | Protein of unknown function DUF74                     | gm1.5120_g_R                                 | Reverse | AAAAGCAGACACCGGAAAGA    |
| gm1.5119_g                                 | Amidase signature enzyme                              | gm1.5119_g_F                                 | Forward | CCGTCTTTTGAGTCTGGAG     |
| gm1.5119_g                                 | Amidase signature enzyme                              | gm1.5119_g_R                                 | Reverse | TCCAGTCCCCGTTGTTTTAG    |
| gm1.5118_g                                 | -                                                     | gm1.5118_g_F                                 | Forward | TGTGCTTGTGGAAGAACCAA    |
| gm1.5118_g                                 | -                                                     | gm1.5118_g_R                                 | Reverse | CATATTC AAGCTTGCACCA    |
| gw1.18.30.1                                | -                                                     | gw1.18.30.1_F                                | Forward | GGTATTGTTAGCCCAACACTTAG |
| gw1.18.30.1                                | -                                                     | gw1.18.30.1-R                                | Reverse | TCCGTCAATGTTAACGAAGCTG  |
| gw1.17.85.1                                | -                                                     | gw1.17.85.1_F                                | Forward | GGATTCTTTTCGGTGACGGTA   |
| gw1.17.85.1                                | -                                                     | gw1.17.85.1_R                                | Reverse | AAGTCGAATCCACGACCAAC    |
| gm1.5099_g                                 | Glycosyl hydrolase, family 13, catalytic region       | gm1.5099_g_F                                 | Forward | ATTCCAAGCTCCCTGGTCTT    |
| gm1.5099_g                                 | Glycosyl hydrolase, family 13, catalytic region       | gm1.5099_g_R                                 | Reverse | GATGACCATGGGAAAGGTGT    |
| estExt_Genewise1.C_170061                  | Sugar transporter                                     | estExt_Genewise1.C_170061_F                  | Forward | TTCCAGAATCTCCTCGTTGG    |
| estExt_Genewise1.C_170061                  | Sugar transporter                                     | estExt_Genewise1.C_170061_R                  | Reverse | AACTTCCAGCCAACAGCATC    |
| fgenesh1_kg.17_#_18_#_Locus3414v1rpkm26.35 | Glycoside hydrolase-type carbohydrate-binding         | fgenesh1_kg.17_#_18_#_Locus3414v1rpkm26.35_F | Forward | ATCCGGGGTAATGCATACAA    |
| fgenesh1_kg.17_#_18_#_Locus3414v1rpkm26.35 | Glycoside hydrolase-type carbohydrate-binding         | fgenesh1_kg.17_#_18_#_Locus3414v1rpkm26.35_R | Reverse | AGACCGGCAAAATGAATCAC    |
| gm1.5092_g                                 | Major facilitator superfamily MFS-1                   | gm1.5092_g_F                                 | Forward | TCCACAGTGGTTGTGTGGAC    |
| gm1.5092_g                                 | Major facilitator superfamily MFS-1                   | gm1.5092_g_R                                 | Reverse | AGTTGCGGGCAAAAATTGAAC   |
| e_gw1.17.116.1                             | Major facilitator superfamily MFS-1                   | e_gw1.17.116.1_F                             | Forward | CTTTGTTTTGGAGCCGTGAT    |
| e_gw1.17.116.1                             | Major facilitator superfamily MFS-1                   | e_gw1.17.116.1_R                             | Reverse | TCAA AATTGTGCAACCAGCA   |
| CE38200_26352                              | Fungal transcriptional regulatory protein, N-terminal | CE38200_26352_F                              | Forward | CGTGTGAAGAGGGACAGGTT    |
| CE38200_26352                              | Fungal transcriptional regulatory protein, N-terminal | CE38200_26352_R                              | Reverse | TCCTTGCTTCGATTTCCCTA    |
| fgenesh1_kg.17_#_14_#_Locus4237v1rpkm6.64  | Major facilitator superfamily MFS-1                   | fgenesh1_kg.17_#_14_#_Locus4237v1rpkm6.64_F  | Forward | TTTGATTGCCGCTGTTACAA    |
| fgenesh1_kg.17_#_14_#_Locus4237v1rpkm6.64  | Major facilitator superfamily MFS-1                   | fgenesh1_kg.17_#_14_#_Locus4237v1rpkm6.64_R  | Reverse | CTGCGTTCCATCAGGAAAAT    |
| gw1.17.11.1                                | Amidohydrolase 1                                      | gw1.17.11.1_F                                | Forward | TTTGAACAGACCTCAACC      |
| gw1.17.11.1                                | Amidohydrolase 1                                      | gw1.17.11.1_R                                | Reverse | TTTCTCGCCCCAACTATCTG    |
| e_gw1.17.17.1                              | Sugar transporter                                     | e_gw1.17.17.1_F                              | Forward | ATTAGGACAGCAGCCAATCG    |
| e_gw1.17.17.1                              | Sugar transporter                                     | e_gw1.17.17.1_R                              | Reverse | TTAAGCTTGCCCTCTTCCAA    |
| e_gw1.17.69.1                              | Major facilitator superfamily MFS-1                   | e_gw1.17.69.1_F                              | Forward | TTTTGCCTGGGGTATAGTGG    |
| e_gw1.17.69.1                              | Major facilitator superfamily MFS-1                   | e_gw1.17.69.1_R                              | Reverse | AATCATCGGAGCGACAAAAA    |
| e_gw1.17.12.1                              | Major facilitator superfamily MFS-1                   | e_gw1.17.12.1_F                              | Forward | GCACATATGGCGTGGTAGAT    |
| e_gw1.17.12.1                              | Major facilitator superfamily MFS-1                   | e_gw1.17.12.1_R                              | Reverse | TCAATGCCTCAATGACCTGA    |
| fgenesh1_pg.17_#_34                        | FAD dependent oxidoreductase                          | fgenesh1_pg.17_#_34_F                        | Forward | CGGGATATGTCAGGTTTCGAT   |
| fgenesh1_pg.17_#_34                        | FAD dependent oxidoreductase                          | fgenesh1_pg.17_#_34_R                        | Reverse | TGGCGTGCTAACATTTTTTCA   |
| e_gw1.17.59.1                              | FAD dependent oxidoreductase                          | e_gw1.17.59.1_F                              | Forward | TGGAAGACCACATCCAGTGA    |
| e_gw1.17.59.1                              | FAD dependent oxidoreductase                          | e_gw1.17.59.1_R                              | Reverse | GGGCAGTTGATCCATTCTGT    |
| fgenesh1_kg.17_#_29_#_Locus4199v1rpkm7.15  | Major facilitator superfamily MFS-1                   | fgenesh1_kg.17_#_29_#_Locus4199v1rpkm7.15_F  | Forward | GGCAGATTCCATCGCATTAT    |
| fgenesh1_kg.17_#_29_#_Locus4199v1rpkm7.15  | Major facilitator superfamily MFS-1                   | fgenesh1_kg.17_#_29_#_Locus4199v1rpkm7.15_R  | Reverse | CATAAGAAGAGCCCCACAA     |
| gm1.5110_g                                 | -                                                     | gm1.5110_g_F                                 | Forward | GAAGCAAGCTTGCCATTC      |
| gm1.5110_g                                 | -                                                     | gm1.5110_g_R                                 | Reverse | AATTGCCAAGTCTCCTGGAA    |
| gw1.17.105.1                               | -                                                     | gw1.17.105.1_F                               | Forward | CTGAGTCAGGTTTCGTCAGTTG  |

|                                          |                                     |                                            |         |                        |
|------------------------------------------|-------------------------------------|--------------------------------------------|---------|------------------------|
| gw1.17.105.1                             | -                                   | gw1.17.105.1_R                             | Reverse | GGTTTCGATGGAAGAAGTGG   |
| gm1.5112_g                               | Major facilitator superfamily MFS-1 | gm1.5112_g_F                               | Forward | GCACCAATGCTTTCTGGATT   |
| gm1.5112_g                               | Major facilitator superfamily MFS-1 | gm1.5112_g_R                               | Reverse | GCAGCGCCTACACCATAAAT   |
| gm1.5113_g                               | Amidase signature enzyme            | gm1.5113_g_F                               | Forward | TGAAGGTGCTTTAGCAGCAA   |
| gm1.5113_g                               | Amidase signature enzyme            | gm1.5113_g_R                               | Reverse | TGAAACATATGCCGGTGCTA   |
| gm1.5095_g                               | Galactokinase                       | gm1.5095_g_F                               | Forward | GCTAGAGCCCCAGGAAGAGT   |
| gm1.5095_g                               | Galactokinase                       | gm1.5095_g_R                               | Reverse | CCTAACGTTGAAGCCACACA   |
| fgenes1_kg.24_#_1_#_Locus2959v1rpkm39.78 | Glycoside hydrolase, family 2       | fgenes1_kg.24_#_1_#_Locus2959v1rpkm39.78_F | Forward | GGGAAAGTATGACGCGGTTA   |
| fgenes1_kg.24_#_1_#_Locus2959v1rpkm39.78 | Glycoside hydrolase, family 2       | fgenes1_kg.24_#_1_#_Locus2959v1rpkm39.78_R | Reverse | CCTTAAAGCGAATTCCAACG   |
| CE38776_32                               | -                                   | CE38776_32_F                               | Forward | CCATCGGTAAGGTCACAAAA   |
| CE38776_32                               | -                                   | CE38776_32_R                               | Reverse | GGTCTCCTTAATCGATGCTTTG |

<sup>a</sup> All amplifications were performed using a Bio-Rad T100 thermal cycler in a total volume of 20 µl containing 0.5 µM of each primer, 0.15 mM of each dNTP, 1.0 unit Titanium Taq DNA polymerase, 1× Titanium Taq. Before amplification, DNA samples were denatured at 94°C for 2 min. Subsequently, 30 cycles were run of 1 min at 94°C, 45 s at 60°C, and 1 min at 72°C, with a final extension step for 10 min at 72°C;

<sup>b</sup> -, Function not known.
